# Supplementary material for: Genetic Characteristics of the Human Hepatic Stellate Cell Line LX-2
Source: PubMed Central journal article supplement (PMC3792989; doi:10.1371/journal.pone.0075692), 2013-10-08
Supplement: pone.0075692.s002.pdf [file pone.0075692.s002.pdf]

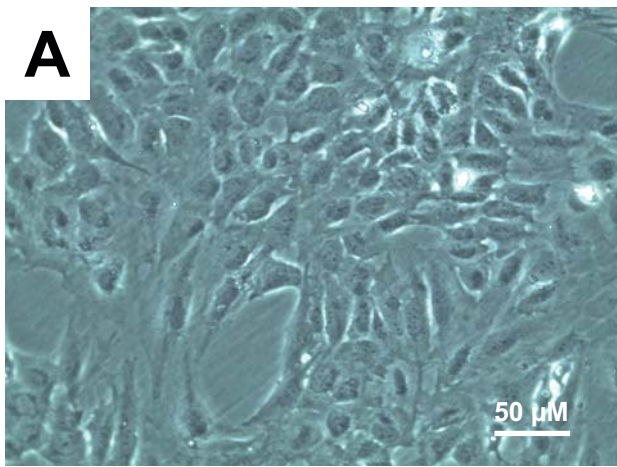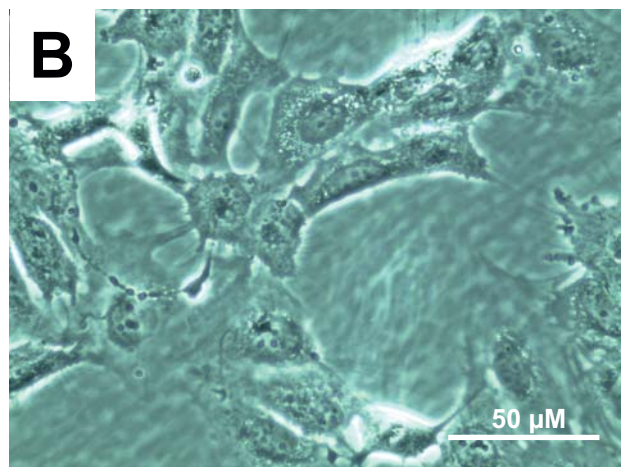

**Weiskirchen *et al.*, Suppl. Figure 2**
