# Supplementary material for: Genetic Characteristics of the Human Hepatic Stellate Cell Line LX-2
Source: PubMed Central journal article supplement (PMC3792989; doi:10.1371/journal.pone.0075692), 2013-10-08

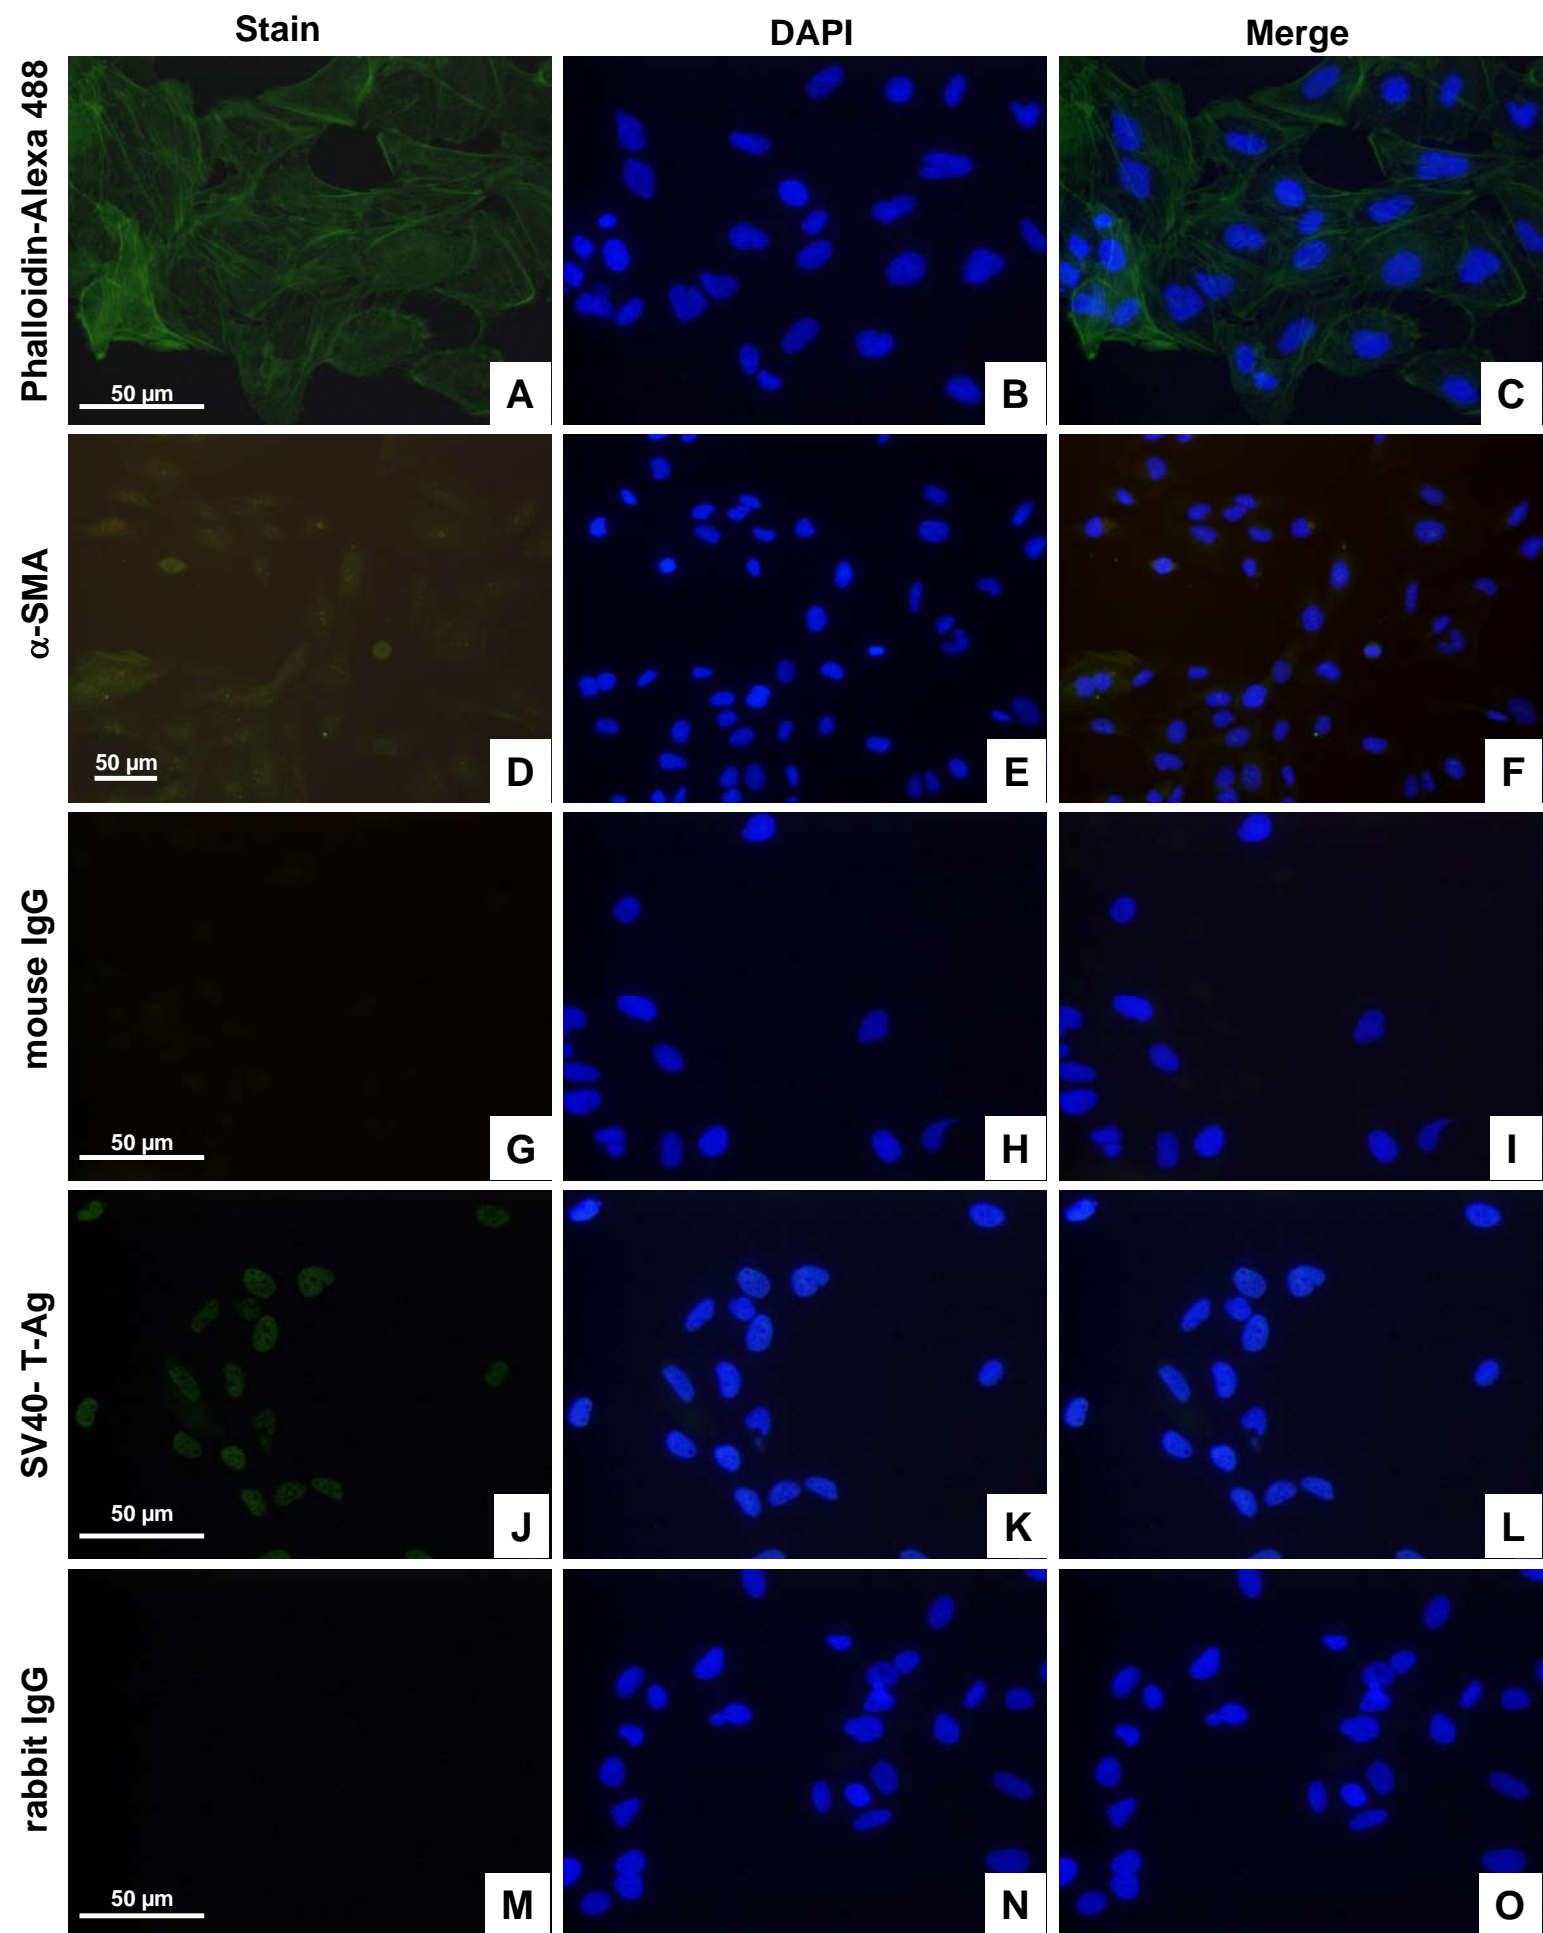

Supplement: pone.0075692.s003.pdf [file pone.0075692.s003.pdf]
