# Supplementary material for: Genetic Characteristics of the Human Hepatic Stellate Cell Line LX-2
Source: PubMed Central journal article supplement (PMC3792989; doi:10.1371/journal.pone.0075692), 2013-10-08
Supplement: pone.0075692.s004.pdf [file pone.0075692.s004.pdf]

**Supplementary Table 1:**  
**Antibodies used in this study**

| <b>Antibody</b>                         | <b>clonality</b> | <b>Supplier</b>                              | <b>Epitope location</b>                                                                                                                                     | <b>Species</b>       | <b>Dilution</b> |
|-----------------------------------------|------------------|----------------------------------------------|-------------------------------------------------------------------------------------------------------------------------------------------------------------|----------------------|-----------------|
| <b>TGF-<math>\beta</math> receptors</b> |                  |                                              |                                                                                                                                                             |                      |                 |
| sc-398                                  | Poly             | Santa Cruz Biotech., Santa Cruz, CA, USA     | peptide mapping within a C-terminal cytoplasmic domain of human TGF $\beta$ RI                                                                              | h, m, r              | 1 : 500         |
| sc-400                                  | Poly             | Santa Cruz                                   | peptide mapping within a cytoplasmic domain of human TGF $\beta$ RII                                                                                        | h, m, r              | 1 : 1,000       |
| sc-6199                                 | Poly             | Santa Cruz                                   | raised against a peptide mapping at the C-terminus of human TGF $\beta$ RIII                                                                                | h, m, r              | 1 : 500         |
| <b>target proteins</b>                  |                  |                                              |                                                                                                                                                             |                      |                 |
| 556430                                  | Mono             | BD Pharmingen, Heidelberg, Germany           | recognized epitope maps to residues 145-164 of human p21                                                                                                    | h, m, r              | 1 : 1,000       |
| sc-14939                                | Poly             | Santa Cruz                                   | CTGF, recognizes internal region of human CTGF                                                                                                              | h, m, r              | 1 : 1,000       |
| ab-92547                                | Mono             | abcam, Cambridge, UK                         | raised against a synthetic peptide corresponding to the C-terminus of human Vimentin                                                                        | h, m, r              | 1 : 1,000       |
| sc-489                                  | Poly             | Santa Cruz                                   | Id2, epitope mapping to the C-terminus, mouse origin                                                                                                        | h, m, r              | 1 : 500         |
| PS065                                   | Poly             | Monosan, Hycultec GmbH, Beutelsbach, Germany | rat Collagen I                                                                                                                                              | h, m, r              | 1 : 500         |
| ab-6586                                 | Poly             | abcam, Cambridge, UK                         | human Collagen IV                                                                                                                                           | h                    | 1 : 1,000       |
| AB1954                                  | Poly             | Millipore, Billerica, MA, USA                | purified rat plasma fibronectin                                                                                                                             | m, r                 | 1 : 1,000       |
| sc-7559                                 | Poly             | Santa Cruz                                   | epitope mapping near the C-terminus of human Desmin                                                                                                         | h, m, r              | 1 : 500         |
| sc-20800                                | Poly             | Santa Cruz                                   | amino acids 4-30 of the SV40 large T antigen                                                                                                                | SV40 large T antigen | 1 : 1,000       |
| CBL 171                                 | Mono             | Millipore                                    | peptide corresponding to the ten N-terminal amino acids of the $\alpha$ -smooth muscle isoform of actin (clone ASM-1)                                       | h, m, r              | 1 : 1,000       |
| <b>protein loading</b>                  |                  |                                              |                                                                                                                                                             |                      |                 |
| A5441                                   | Mono             | Sigma-Aldrich, Taufkirchen, Germany          | $\beta$ -actin, raised against a synthetic KHL-coupled slightly modified peptide raised against $\beta$ -cytoplasmic actin N-terminal peptide (clone AC-15) | h, m, r              | 1 : 10,000      |
