# Supplementary material for: Genetic Characteristics of the Human Hepatic Stellate Cell Line LX-2
Source: PubMed Central journal article supplement (PMC3792989; doi:10.1371/journal.pone.0075692), 2013-10-08
Supplement: pone.0075692.s005.pdf [file pone.0075692.s005.pdf]

**Supplementary Table 2:  
Spectral karyotyping (SKY) analysis of LX-2 cells**

| Abberation                                      | P02 | P04 | P07 | P08 | P10 | P11 | P12 | P13 | total no. chromosomes | pos. cells | %    |
|-------------------------------------------------|-----|-----|-----|-----|-----|-----|-----|-----|-----------------------|------------|------|
| der(1)t(1;6)(q41;q22.3)del(1)(p35)              | 1   |     |     |     |     |     |     |     | 1                     | 1          | 12,5 |
| der(1)t(1;6)(q22;q24)                           |     | 1   |     |     |     |     |     |     | 1                     | 1          |      |
| der(1)t(1;7)(p22;q22)                           |     |     |     |     |     | 1   |     |     | 1                     | 1          |      |
| der(1)t(1;7)(p32;q22)t(1;11)(q12;?)             | 1   |     |     |     |     |     |     |     | 1                     | 1          |      |
| der(1)t(1;7)(q23;q22)del(1)(p22)                |     | 1   |     |     |     |     |     |     | 1                     | 1          |      |
| der(1)t(1;18)(p11;q21)t(1;7)(q42;p12)           |     |     |     |     |     |     | 1   |     | 1                     | 1          |      |
| der(1)del(1)(p31)del(1)(q12)                    | 1   |     |     |     |     |     |     |     | 1                     | 1          |      |
| der(2)t(2;10)(p11;q11)                          |     |     |     |     |     |     | 1   |     | 1                     | 1          |      |
| del(1)(p11)                                     |     |     |     |     | 1   |     |     |     | 1                     | 1          |      |
| del(1)(q31)                                     |     |     | 1   |     |     |     |     |     | 1                     | 1          |      |
| del(2)(p11)                                     |     |     |     |     |     | 1   |     |     | 1                     | 1          |      |
| del(2)(q11)                                     | 1   |     |     |     |     | 1   | 1   |     | 3                     | 3          | 37,5 |
| der(2)del(2)(p21)del(2)(q23)                    |     |     |     |     | 1   |     |     |     | 1                     | 1          |      |
| der(2)del(2)(p16)del(2)(q32)                    | 1   |     |     |     |     |     |     |     | 1                     | 1          |      |
| der(2)del(2)(p13)del(2)(q11)                    | 1   |     |     |     |     |     |     |     | 1                     | 1          |      |
| der(2)del(2)(p11)del(2)(q23)                    |     |     |     |     | 1   |     |     |     | 1                     | 1          |      |
| der(2)del(2)(p11)del(2)(q24)                    |     |     | 1   |     |     |     |     |     | 1                     | 1          |      |
| der(3)t(5;3)(q22;p12)t(3;5)(q24;q23)            |     |     |     |     | 1   |     |     |     | 1                     | 1          |      |
| der(3)t(3;20)(q26;q11)                          |     |     |     | 1   |     |     |     |     | 1                     | 1          |      |
| der(3)t(3;5)(p14;q23)                           |     |     |     |     | 1   |     |     |     | 1                     | 1          |      |
| der(3)t(3;5)(p11;q23)t(3;5)(q24;q23)del(5)(q14) |     |     |     |     |     |     | 1   |     | 1                     | 1          |      |
| der(3)t(3;6)(qter;q11)                          |     |     |     |     |     |     | 1   |     | 1                     | 1          |      |
| del(3)(q11)                                     | 1   |     |     |     |     |     |     |     | 1                     | 1          |      |
| del(3)(p11)                                     | 1   | 2   |     |     |     |     |     |     | 3                     | 2          |      |
| del(3)(q13)                                     |     | 1   |     |     |     |     |     |     | 1                     | 1          |      |
| del(3)(p13)                                     |     |     |     |     | 2   |     |     |     | 2                     | 1          |      |
| del(3)(p14)                                     |     | 1   |     |     |     |     |     |     | 1                     | 1          |      |
| del(3)(q22)                                     |     |     |     |     |     | 1   |     |     | 1                     | 1          |      |
| del(3)(q25)                                     |     |     |     |     |     | 2   |     |     | 2                     | 1          |      |
| del(3)(q26)                                     |     |     |     |     |     |     |     | 1   | 1                     | 1          |      |
| der(3)del(3)(p12)del(3)(q26)                    |     |     |     |     |     |     |     | 1   | 1                     | 1          |      |



|                                                     |   |   |   |   |   |   |   |   |    |   |      |
|-----------------------------------------------------|---|---|---|---|---|---|---|---|----|---|------|
| del(8)(p21)                                         |   |   | 1 |   |   | 1 |   |   | 2  | 2 |      |
| i(8)(q10)                                           | 1 |   |   |   |   |   |   |   | 1  | 1 |      |
| der(8)del(8)(p21)del(8)(q11)                        |   |   | 1 |   |   |   |   |   | 1  | 1 |      |
| del(8)(p11p21)                                      | 1 |   |   |   |   |   |   |   | 1  | 1 |      |
| del(8)(q11)                                         |   | 1 |   |   |   |   |   |   | 1  | 1 |      |
| del(8)(p12)                                         | 1 |   | 1 |   |   |   |   |   | 2  | 2 |      |
| del(9)(p11)                                         | 2 |   |   |   |   |   |   |   | 2  | 1 |      |
| del(9)(p12)                                         |   |   |   | 1 |   |   |   |   | 1  | 1 |      |
| del(9)(p?)                                          | 1 |   |   |   |   |   |   |   | 1  | 1 |      |
| del(9)(p21)                                         |   |   | 1 |   |   |   |   |   | 1  | 1 |      |
| del(9)(q11)                                         |   | 1 |   |   |   |   |   |   | 1  | 1 |      |
| der(9)t(9;3)(qter;p22)del(9)(p11)                   |   |   |   |   |   |   | 1 |   | 1  | 1 |      |
| der(9)t(9;Y)(p11;p11)                               |   |   |   | 1 |   |   |   |   | 1  | 1 |      |
| der(9)t(9;14)(p12;q11)t(11;14)(q14;q24)del(11)(q12) | 1 | 2 | 1 |   | 2 | 1 | 1 | 2 | 10 | 7 | 87,5 |
| der(10)t(5;10)(p12;p11)                             |   |   |   |   |   |   | 1 |   | 1  | 1 |      |
| der(10)del(10)(p11)del(10)(q23)                     |   |   | 1 |   |   |   |   |   | 1  | 1 |      |
| der(10)del(10)(p12)del(10)(q23)                     |   |   |   |   |   |   | 1 |   | 1  | 1 |      |
| der(10)del(10)(p13)del(10)(q21)                     |   |   |   |   | 1 |   |   |   | 1  | 1 |      |
| der(10)del(10)(p14)del(10)(q22)                     |   |   |   |   |   |   |   | 1 | 1  | 1 |      |
| del(10)(p11)                                        |   |   |   |   |   |   |   | 1 | 1  | 1 |      |
| del(10)(p12)                                        |   |   | 1 |   |   |   |   |   | 1  | 1 |      |
| del(10)(q11)                                        |   | 1 |   |   |   |   |   |   | 1  | 1 |      |
| del(10)(q22)                                        | 1 |   |   | 3 |   | 2 |   | 1 | 7  | 4 | 50   |
| del(10)(q24)                                        |   |   |   |   |   |   |   | 1 | 1  | 1 |      |
| i(10)(q10)                                          | 1 |   |   |   |   | 1 |   |   | 1  | 1 |      |
| del(11)(p13)                                        |   | 2 |   |   |   |   |   |   | 2  | 1 |      |
| del(11)(p14)                                        |   |   |   |   |   |   | 1 |   | 1  | 1 |      |
| del(11)(q13)                                        |   |   |   | 1 |   |   |   |   | 1  | 1 |      |
| del(11)(q22)                                        |   |   |   |   | 1 |   |   |   | 1  | 1 |      |
| der(11)del(11)(p11)del(11)(q14)                     |   |   |   | 1 |   |   |   |   | 1  | 1 |      |
| der(11)del(11)(p11)del(11)(q22)                     | 2 |   |   |   |   |   |   | 2 | 4  | 2 |      |
| der(11)del(11)(p12)del(11)(q14)                     |   |   | 2 |   |   |   |   |   | 2  | 1 |      |
| der(11)del(11)(p14)del(11)(q23)                     |   |   |   |   |   |   | 2 |   | 2  | 1 |      |
| der(11)t(11;5)(q14;q14)                             |   |   |   | 1 |   |   |   |   | 1  | 1 |      |
| der(11)t(11;14)(p11;q32)del(11)(q22)                | 1 |   |   |   |   |   |   |   | 1  | 1 |      |
| der(11)t(11;22)(p11;q12)del(11)(q22)                |   |   |   |   |   |   |   | 2 | 2  | 1 |      |

|                                        |   |   |   |   |   |   |   |   |   |   |  |
|----------------------------------------|---|---|---|---|---|---|---|---|---|---|--|
| der(11)del(11)(p14)del(11)(q22)        | 1 |   |   |   |   | 1 |   |   | 2 | 2 |  |
| i(11)(q10)                             |   |   |   |   |   | 1 |   |   | 1 | 1 |  |
| der(12)t(12;22)(q13;q12)               |   |   |   |   |   |   | 1 |   | 1 | 1 |  |
| del(12)(q11)                           |   | 2 | 1 |   |   |   |   |   | 3 | 2 |  |
| del(12)(p12)                           |   |   | 1 |   |   |   |   |   | 1 | 1 |  |
| del(12)(p12.3)                         |   |   |   |   |   |   |   | 3 | 3 | 1 |  |
| del(13)(q21)                           |   |   | 1 | 1 |   |   |   |   | 2 | 2 |  |
| del(13)(q22)                           |   |   |   |   | 1 |   |   |   | 1 | 1 |  |
| del(13)(q32)                           | 1 |   |   |   |   |   |   |   | 1 | 1 |  |
| der(13)t(13;15)(p11;q11)               |   |   |   |   |   |   |   | 1 | 1 | 1 |  |
| der(13)t(20;13)(q11;pter)              |   |   | 1 |   |   |   |   |   | 1 | 1 |  |
| der(14)t(21;14)(q11;pter)              |   |   | 1 |   |   |   |   |   | 1 | 1 |  |
| i(15)(p10)                             |   |   |   |   |   |   | 1 |   | 1 | 1 |  |
| i(15)(q10)                             |   |   |   |   |   |   |   | 1 | 1 | 1 |  |
| del(15)(q23)                           |   | 2 |   |   |   |   |   |   | 2 | 1 |  |
| del(15)(q15)                           |   |   |   |   | 1 |   |   |   | 1 | 1 |  |
| der(15)t(3;15)(q11;p11)                |   |   |   | 1 |   |   |   |   | 1 | 1 |  |
| der(15)t(8;15)(p11;pter)               |   |   |   |   | 1 |   |   |   | 1 | 1 |  |
| der(15)t(15;13)(qter;q12)              |   |   | 1 |   |   |   |   |   | 1 | 1 |  |
| der(15)t(15;20)(q15;q11)               |   |   |   |   |   |   | 1 |   | 1 | 1 |  |
| der(16)t(16;17)(p11;q11)               |   |   |   |   |   |   | 1 |   | 1 | 1 |  |
| der(16)t(16;17)(q21;q21)               | 1 |   |   |   |   |   |   |   | 1 | 1 |  |
| del(16)(p11)                           |   |   |   | 1 |   | 1 |   |   | 2 | 2 |  |
| idic(16)(pter)del(16)(q12)del(16)(q12) |   |   |   |   | 1 |   |   |   | 1 | 1 |  |
| der(17)del(17)(p?)del(17)(q?)          |   |   | 1 |   |   |   |   |   | 1 | 1 |  |
| der(17)del(17)(p11)del(17)(q12)        |   |   |   |   | 1 |   |   |   | 1 | 1 |  |
| der(17)t(17;21)(qter;q11)              |   |   | 1 |   |   |   |   |   | 1 | 1 |  |
| del(17)(p11)                           |   | 1 |   |   |   |   |   | 1 | 2 | 2 |  |
| del(17)(q21)                           |   |   |   |   |   |   |   | 1 | 1 | 1 |  |
| i(17)(q10)                             |   | 1 |   |   |   |   |   |   | 1 | 1 |  |
| del(18)(p11)                           |   | 1 |   |   |   |   |   |   | 1 | 1 |  |
| del(18)(q12)                           |   |   |   |   | 1 |   |   |   | 1 | 1 |  |
| der(18)t(3;18)(p13;pter)               |   |   |   |   |   |   |   | 1 | 1 | 1 |  |
| der(18)t(8;18)(p11;pter)               |   |   |   |   |   |   |   | 1 | 1 | 1 |  |
| der(18)t(16;18)(p11;p11)               |   |   | 1 |   |   |   |   |   | 1 | 1 |  |
| der(18)dup(18)(q11q21)dup(18)(q11q21)  |   |   |   | 1 |   |   |   |   | 1 | 1 |  |

|                                                  |   |   |   |   |   |   |   |   |   |   |  |
|--------------------------------------------------|---|---|---|---|---|---|---|---|---|---|--|
| der(19)t(7;19)(q11;p12)                          |   |   |   |   | 1 |   |   |   | 1 | 1 |  |
| del(19)(p12)                                     |   |   |   |   |   | 1 |   |   | 1 | 1 |  |
| del(19)(p13.1)                                   |   | 1 |   |   |   |   |   |   | 1 | 1 |  |
| del(19)(q13.1)                                   |   |   |   | 2 |   |   |   |   | 2 | 1 |  |
| der(20)t(20;9)(q11;q22)                          |   |   |   |   |   | 1 |   |   | 1 | 1 |  |
| der(20)t(20;Y)(p11;?)                            | 1 |   |   |   |   |   |   |   | 1 | 1 |  |
| del(20)(p11)                                     |   | 2 |   |   |   |   |   |   | 2 | 1 |  |
| del(20)(q12)                                     |   |   |   | 4 |   |   |   |   | 4 | 1 |  |
| der(21)t(21;13)(p11;q11)                         |   |   |   |   |   |   | 1 |   | 1 | 1 |  |
| der(22)t(22;11)(p11;q11)del(11)(q14)             |   |   |   |   |   | 1 |   |   | 1 | 1 |  |
| der(22)t(22)(8;22)(q22;p11)t(22)(19;22)(q12;q12) |   |   |   |   |   | 1 |   |   | 1 | 1 |  |
| der(X)del(X)(p21)del(X)(q21)                     |   |   |   |   | 1 |   |   |   | 1 | 1 |  |
| der(X)t(X;2)(q22;q32)                            |   |   | 2 |   |   |   |   |   | 2 | 1 |  |
| der(X)t(2;X)(p11;q11)                            |   |   |   |   |   |   |   | 1 | 1 | 1 |  |
| der(X)t(X;10)(q28;q22)del(X)(p11)                |   |   |   | 1 |   |   |   |   | 1 | 1 |  |
| del(X)(q21)                                      |   |   |   |   |   |   | 1 |   | 1 | 1 |  |
| del(X)(q24)                                      |   |   |   |   |   |   | 1 |   | 1 | 1 |  |
| del(X)(q25)                                      |   |   |   |   |   |   | 1 |   | 1 | 1 |  |
| i(X)(q10)                                        |   |   |   |   |   |   |   | 1 | 1 | 1 |  |
| der(Y)t(3;Y)(p12;p11)                            |   | 1 |   |   |   |   |   |   | 1 | 1 |  |
| der(Y)t(21;Y)(q11;p11)                           |   |   |   |   |   | 1 |   |   | 1 | 1 |  |

Note: Chromosome aberrations that were found in 3 or 4 cells of all chromatograms analysed (n = 8) are marked in light grey and those obtained in 7 of 8 cells (87.5%) in dark grey.
