# Supplementary material for: Genetic Characteristics of the Human Hepatic Stellate Cell Line LX-2
Source: PubMed Central journal article supplement (PMC3792989; doi:10.1371/journal.pone.0075692), 2013-10-08
Supplement: pone.0075692.s006.pdf [file pone.0075692.s006.pdf]

### Supplementary Table 3:

#### Short tandem repeat analysis of cells used in this study

| STR Locus  | LX-2     | HepG2  | Hep3B    | Wi-38 (VA-13) |
|------------|----------|--------|----------|---------------|
| D16S539    | 13       | 12; 13 | 10       | 11; 12        |
| D7S820     | 11       | 10     | 8; 10    | 9; 11         |
| D13S317    | 11; 13   | 9; 13  | 12; 14   | 11            |
| D5S818     | 11; 12   | 11; 12 | 13       | 10            |
| CSF1PO     | 10; 12   | 10; 11 | 8        | 10; 12        |
| TPOX       | 8; 9     | 8; 9   | 9        | 8             |
| Amelogenin | X; Y     | X; Y   | X        | X             |
| TH01       | 9.3      | 9      | 6; 7     | 9.3           |
| vWA        | 17       | 17     | 17       | 19; 20        |
| D8S1179    | 13       | 15; 16 | 12       | 14            |
| D21S11     | 28; 31   | 29; 31 | 30; 31   | 30; 30.2      |
| D3S1358    | 13; 15   | 15; 16 | 15       | 16; 17        |
| D2S1338    | 17       | 19; 20 | 21; 25   | 19; 25        |
| D19S433    | 13; 15.2 | 15.2   | 12.2; 14 | 13; 16.2      |
| D18S51     | 12       | 13; 14 | 20       | 16; 18        |
| FGA        | 21; 26   | 22; 25 | 18       | 22; 24        |

\* Note: STR loci of LX-2 were genotyped by usage of the PowerPlex® 1.2 System and the AmpFISTR® Identifiler® PCR Amplification Kit. All other cell lines were genotyped by use of the AmpFISTR® Identifiler® PCR Amplification Kit. These preformatted kit systems provide all of the materials necessary for coamplification of nine (PowerPlex® 1.2. System) or 15 STR loci (AmpFISTR Identifiler® PCR Amplification Kit). In both kit systems, one of the amplified markers corresponds to the sex identification locus Amelogenin that display different sizes when amplified from X- or Y-chromosomes, thereby allowing gender-determination.
